# Supplementary material for: Development of a Cell-penetrating Peptide that Exhibits Responsive Changes in its Secondary Structure in the Cellular Environment
Source: PubMed Central journal article supplement (PMC5016780; doi:10.1038/srep33003), 2016-09-09
Supplement: srep33003-s1.pdf [file srep33003-s1.pdf]

# **Development of a Cell-penetrating Peptide that Exhibits Responsive Changes in its Secondary Structure in the Cellular Environment**

Hiroko Yamashita,<sup>1</sup> Takuma Kato,<sup>2</sup> Makoto Oba,<sup>2</sup> Takashi Misawa,<sup>1</sup> Takayuki Hattori,<sup>1</sup>

Nobumichi Ohoka,<sup>1</sup> Masakazu Tanaka,<sup>2</sup> Mikihiro Naito,<sup>1</sup>

Masaaki Kurihara,<sup>1\*</sup> and Yosuke Demizu<sup>1\*</sup>

<sup>1</sup>National Institute of Health Sciences, Tokyo 158-8501, Japan

<sup>2</sup>Graduate School of Biomedical Sciences, Nagasaki University, 1-14 Bunkyo-machi,

Nagasaki 852-8521, Japan

\*Corresponding author

E-mail: demizu@nihs.go.jp; masaaki@nihs.go.jp

## Table of contents

|                                                         |     |
|---------------------------------------------------------|-----|
| General                                                 | S3  |
| Synthesis and purification of peptide <b>1—5</b> and R9 | S4  |
| Characterization of peptides (Figures S1-S6)            | S5  |
| CD spectra of peptides (Figure S7)                      | S9  |
| Pre-incubation and LC-MS analysis (Figure S8)           | S10 |
| Cytotoxicity of R9 and peptides (Figure S9)             | S10 |
| Effect of endocytosis inhibitors (Figure S10)           | S11 |
| Fluorescence microscopy images (Figures S11 and S12)    | S11 |
| Direct cell permeability of peptides (Figure S13)       | S13 |

**General.** All coupling reagents were obtained from *Watanabe Chemical Industries, LTD.* and were used as supplied without further purification. Fmoc-protected amino acids were obtained from *Tokyo Chemical Industry Co., LTD.* and *Watanabe Chemical Industries, LTD.* Analytical thin-layer chromatography was performed on *Merck Silica Gel F<sub>254</sub>*. High-resolution mass spectra were recorded with *SHIMAZU LCMS-IT-TOF* spectrometer. The purified peptides were characterized using 4800 Plus MALDI TOF/TOF<sup>TM</sup> Analyzer (Applied Biosystems/MDS SCIEX), and liquid chromatography–mass spectrometry-ion trap-time-of-flight (LCMS-IT-TOF) spectroscopy (Shimadzu). Fluorescence intensity was recorded with FACSCalibur (Becton Dickinson Co., Ltd.).

**Synthesis and purification of peptide 1–5 and R9.** The proline derivatives Fmoc-Pro<sup>NH<sub>2</sub></sup>-OH and Fmoc-Pro<sup>Gu</sup>-OH were synthesized following the reported synthetic methods. The peptides were synthesized using solid-phase methods on NovaPEG Rink amide resin following the standard Fmoc chemistry. The following describes a representative coupling and deprotection cycle at a 25 μmol scale. First, 65 mg NovaPEG Rink amide resin (loading: 0.5 mmol/g) was soaked for 1 hr in CH<sub>2</sub>Cl<sub>2</sub>. After the resin had been washed with *N,N*-dimethylformamide (DMF), Fmoc-amino acid (4 Eq), 1-[bis(dimethylamino)methylene]-1H-1,2,3-triazolo[4,5-b]pyridinium 3-oxide hexafluorophosphate (HATU) (4 Eq) and 1-hydroxy-7-azabenzotriazole (HOAt) (4 Eq) dissolved in 1 mL *N*-methyl-2-pyrrolidone (NMP) were added to the resin. Then, *N,N*-diisopropylethylamine (8 Eq) was added for the coupling reaction

and the resulting mixture was shook for 1 hr at room temperature. Fmoc-deprotection was carried out by 2 mL of 20% piperidine in NMP (2 mL) for 15 min at room temperature. After the peptide elongation, the resin was suspended in cleavage cocktail [1.9 mL trifluoroacetic acid (TFA), 50  $\mu$ L water, 50  $\mu$ L triisopropylsilane; final concentration: 95% TFA, 2.5% water, 2.5% triisopropylsilane] for 3 h at room temperature. The TFA solution was evaporated to a small volume under a stream of  $N_2$  and dripped into cold ether to precipitate the peptides. The dried crude peptides were dissolved in 1.3 mL of 50% acetonitrile in water and then purified by reversed-phase HPLC using a Discovery® BIO Wide Pore C18 column (25 cm x 21.2 mm). After being purified, the peptide solutions were lyophilized. Peptide purity was assessed using analytical HPLC and a Discovery® BIO Wide Pore C18 column (25 cm x 4.6 mm; solvent A: 0.1% TFA/water, solvent B: 0.1% TFA/MeCN, flow rate: 1.0 mL•mL<sup>-1</sup>, gradient: 0-100% gradient of solvent B over 30 min). The peptides were characterized by matrix-assisted laser desorption/ionization mass spectrometry and LC-MS.

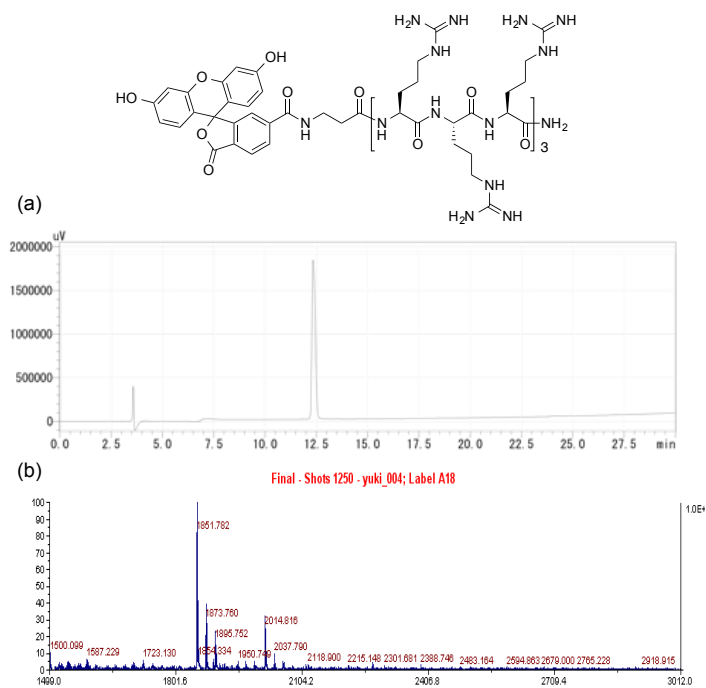

**Figure S1.** Purification of R9. (a) RP-HPLC profile. (b) MALDI-MS.

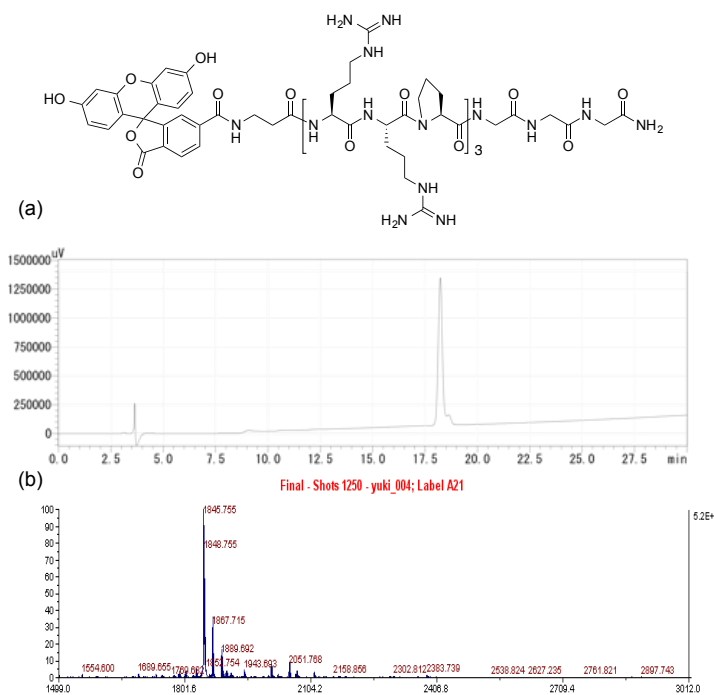

**Figure S2.** Purification of peptide 1. (a) RP-HPLC profile. (b) MALDI-MS.

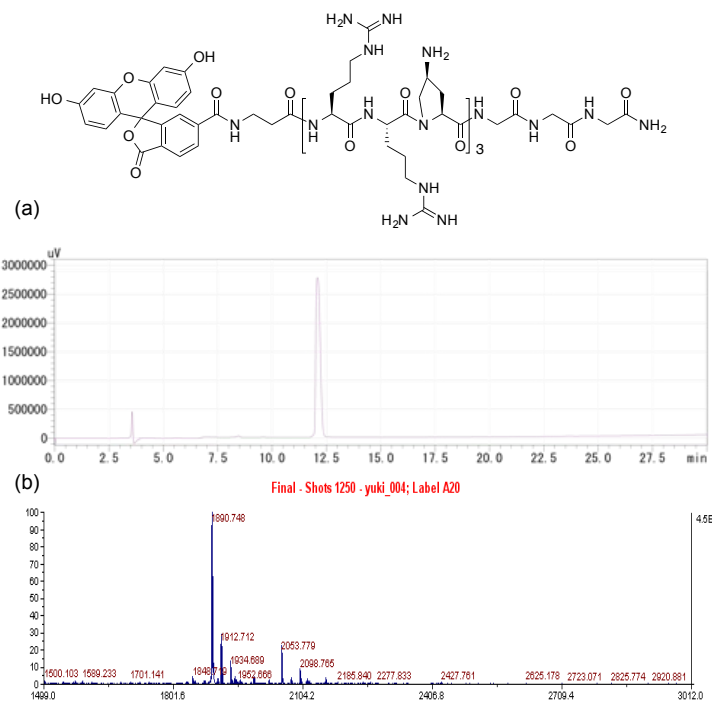

**Figure S3.** Purification of peptide 2. (a) RP-HPLC profile. (b) MALDI-MS.

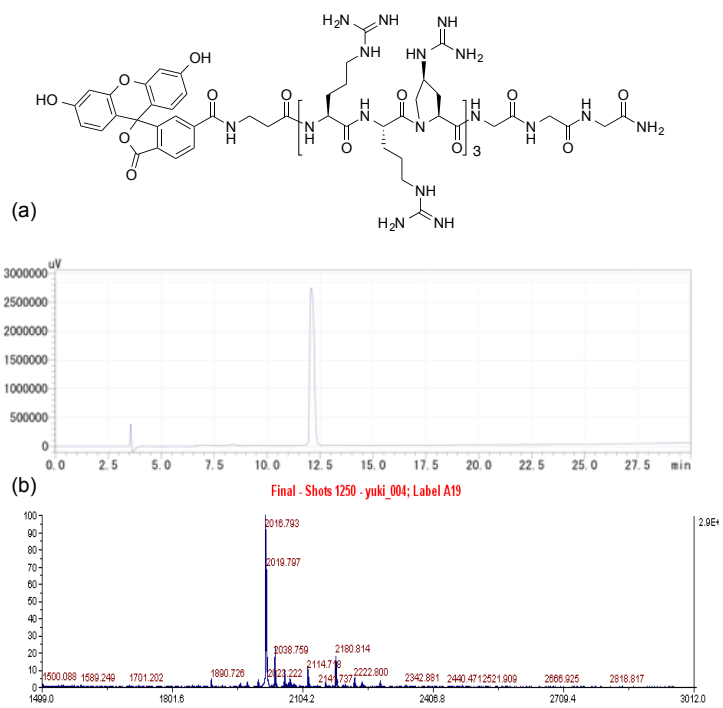

**Figure S4.** Purification of peptide **3**. (a) RP-HPLC profile. (b) MALDI-MS.

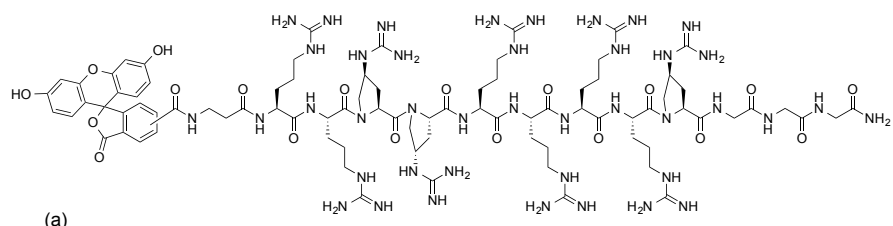

(a)

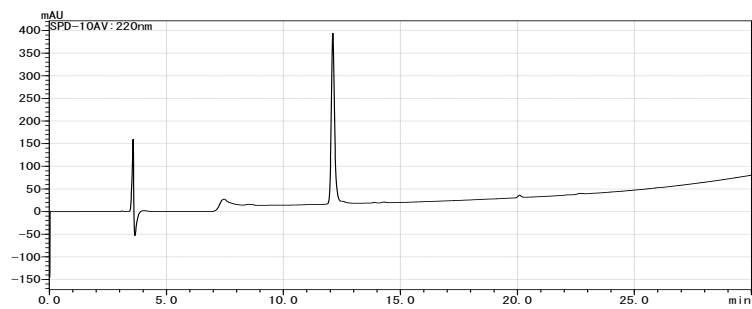

(b)

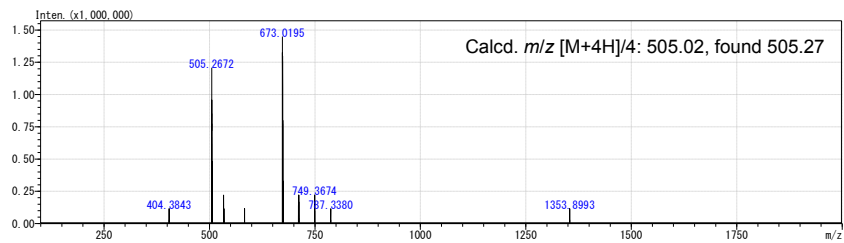

**Figure S5.** Purification of peptide 4. (a) RP-HPLC profile. (b) LC-MS.



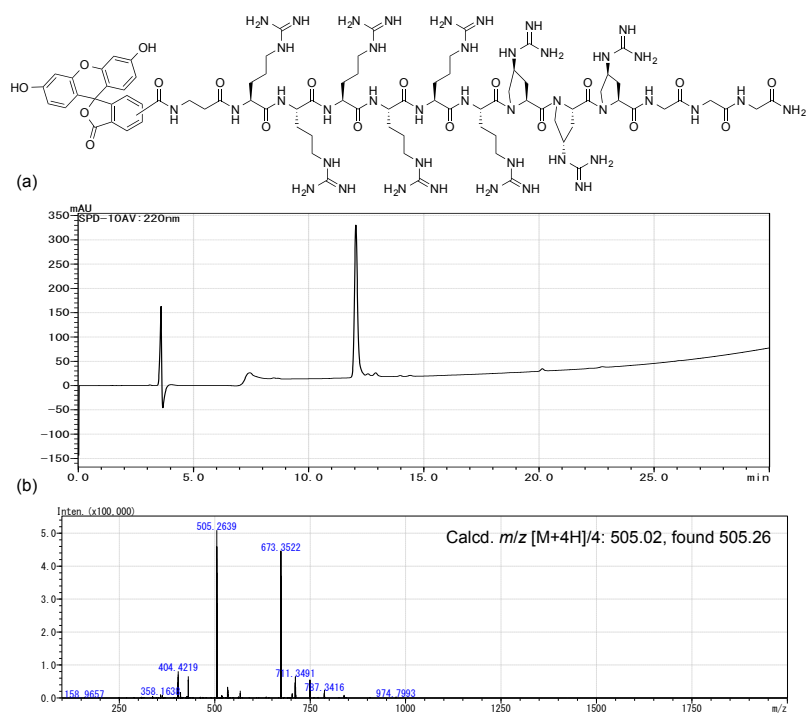

**Figure S6.** Purification of peptide **5**. (a) RP-HPLC profile. (b) LC-MS.

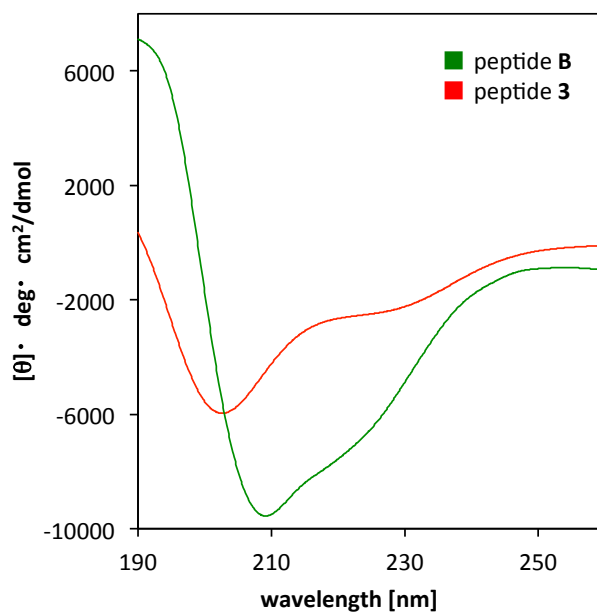

**Figure S7.** CD spectra of peptides **B** and **3** in 1.0 v/w% SDS in phosphate buffer.

Peptide concentration: 100  $\mu\text{M}$ .

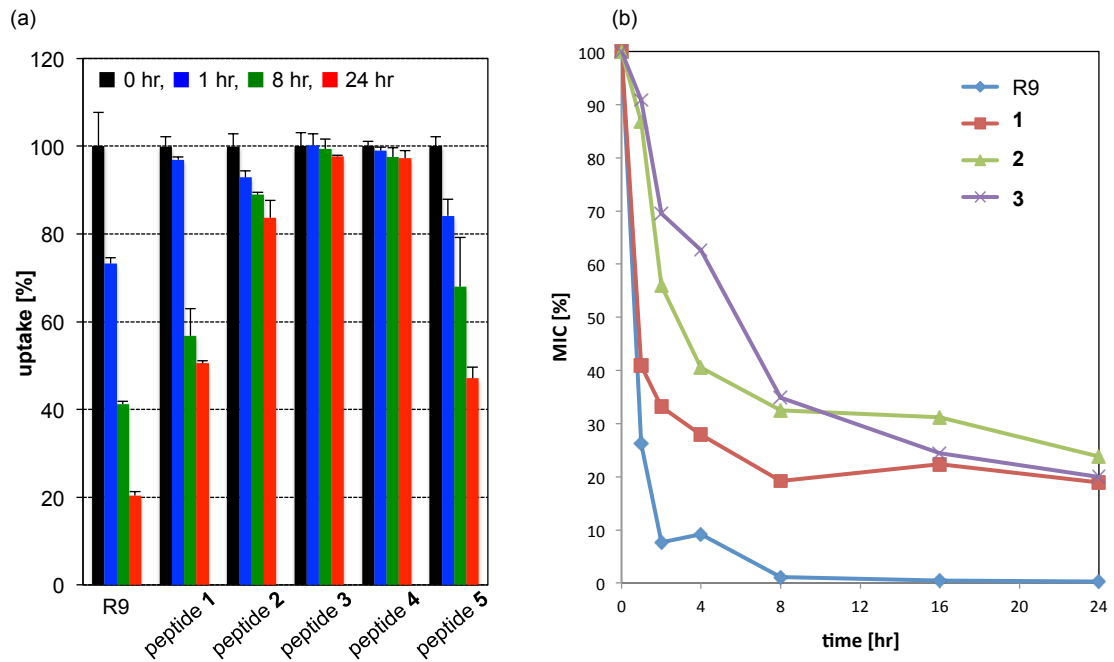

**Figure S8.** (a) Cellular uptake of the peptides 1-5 after 1-24 h pre-incubation (peptide concentration: 1  $\mu$ M). Values are the means  $\pm$  standard deviation of three independent cultures. (b) The peptides' stability (1-24 hr) analysis in culture medium containing FBS using LC-MS.

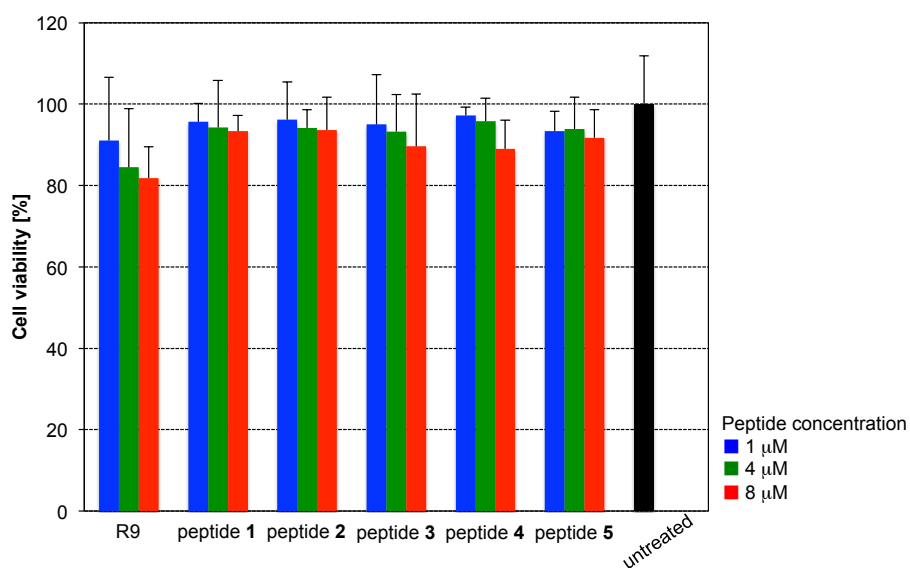

**Figure S9.** The cytotoxicity of R9 and peptides 1-5.

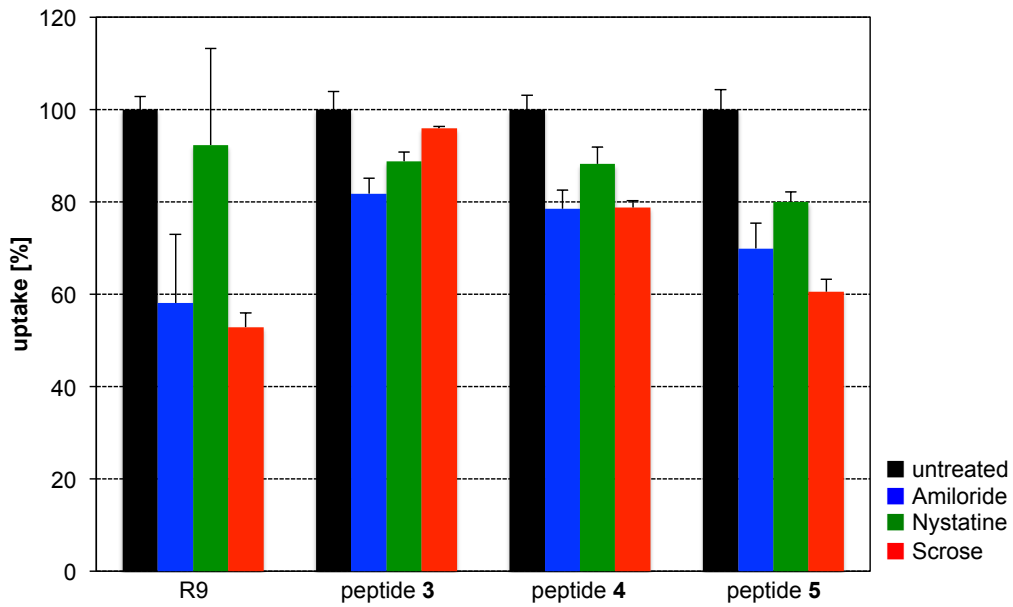

**Figure S10.** Flow cytometry profile of HeLa cells treated with various endocytosis inhibitors (amiloride, nystatin, scrosc).

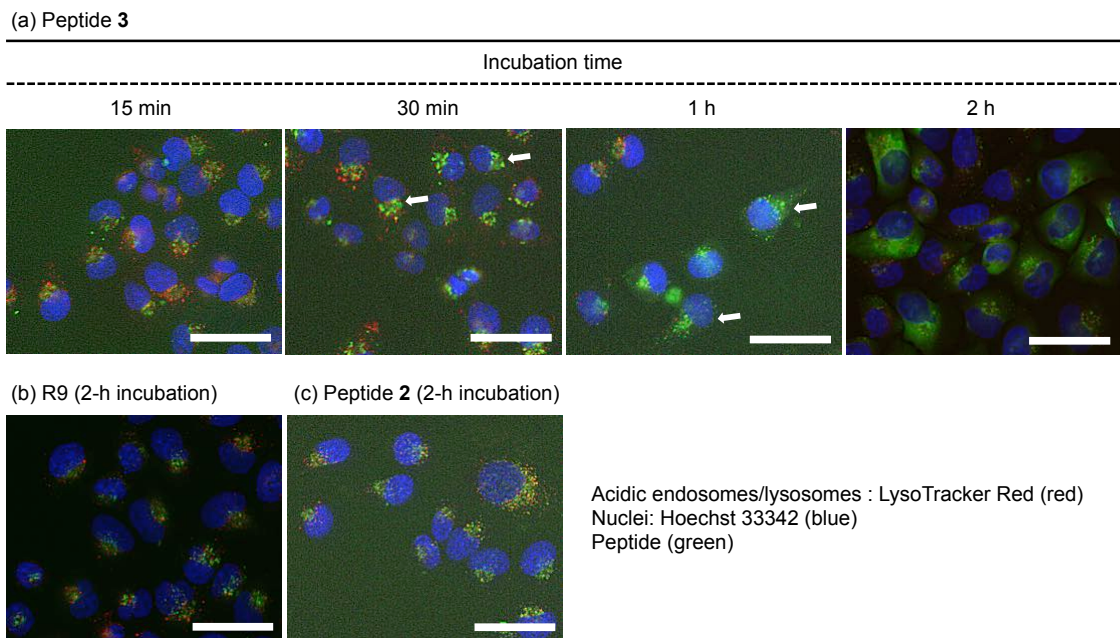

**Figure S11.** Fluorescence microscopy images of HeLa cells that had been treated with 10  $\mu$ M of peptides [(a) peptide 3, (b) R9, (c) peptide 2] for 15 min-2 hr at 37  $^{\circ}$ C. The

peptides fluoresced in the cells (green). The acidic late endosomes/lysosomes were stained with LysoTracker Red (red), and the nuclei were stained with Hoechst 33342 (blue). The scale bars represent 50  $\mu\text{m}$ .

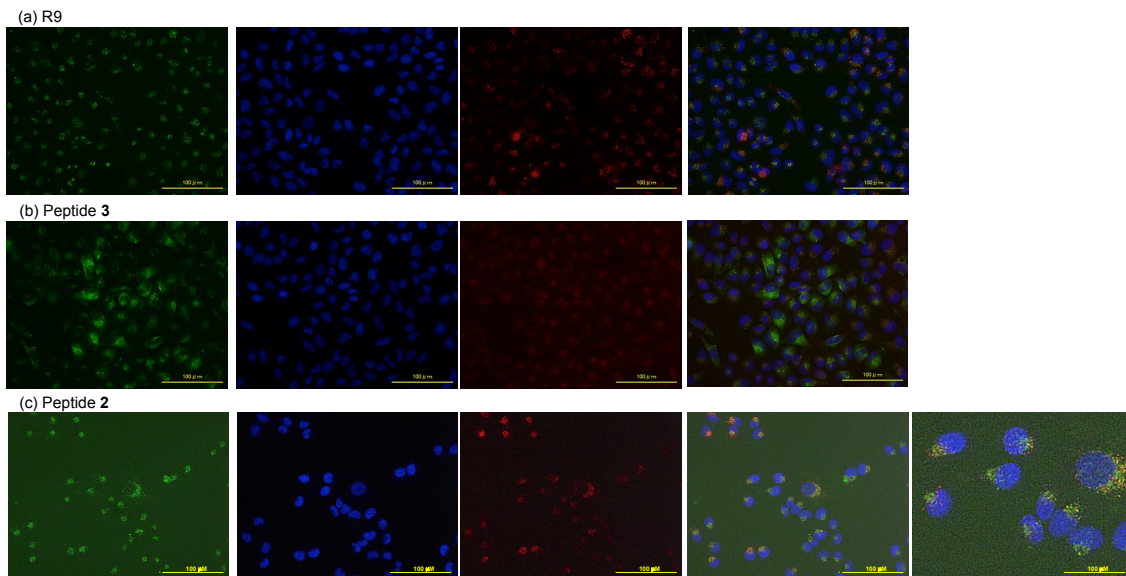

**Figure S12.** Fluorescence microscopy images of HeLa cells that had been treated with 10  $\mu\text{M}$  of peptides [(a) R9, (b) peptide 3, (c) peptide 2] for 2 hr at 37  $^{\circ}\text{C}$ . The peptides fluoresced in the cells (green). The acidic late endosomes/lysosomes were stained with LysoTracker Red (red), and the nuclei were stained with Hoechst 33342 (blue).

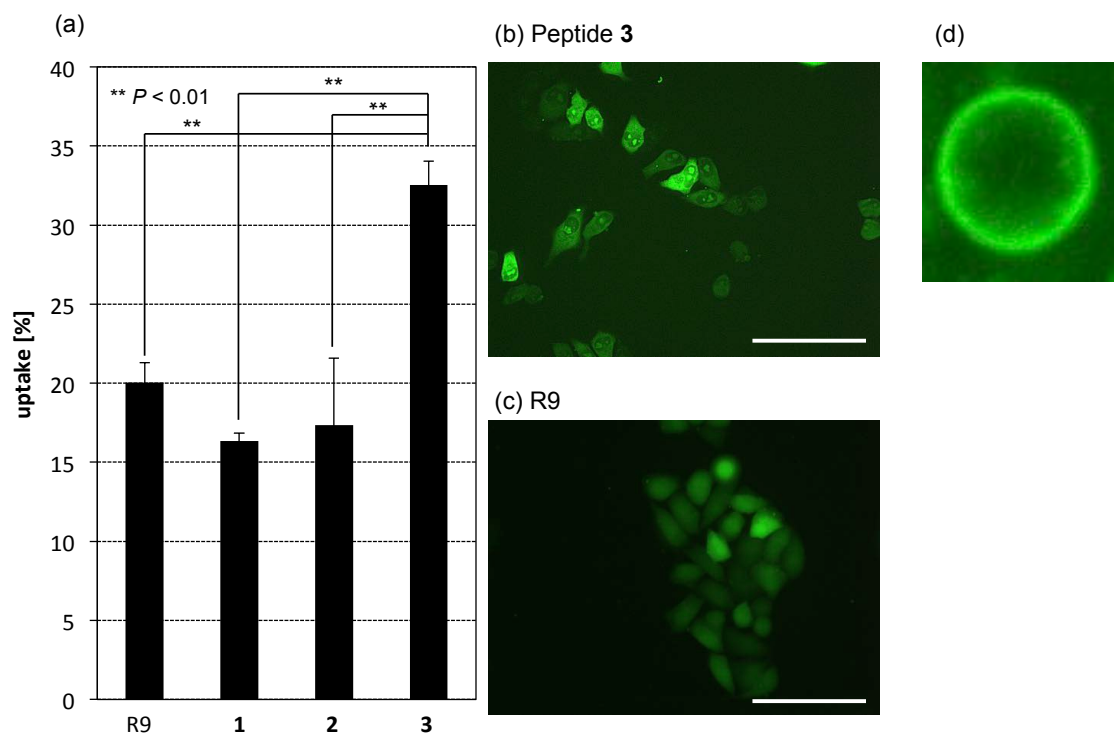

**Figure S13.** Direct cell permeability of R9 and peptides 1—3. (a) Flow cytometry profile of HeLa cells incubated at 4 °C for 1 hr. 100% uptake was calculated from the fluorescence intensity in the cells incubated at 37 °C. (b), (c) Fluorescence microscopy images of HeLa cells treated with 10-µM peptide 3 (b) and R9 (c) for 30 min at 4 °C. The peptides fluoresced in the cells (green). The scale bars represent 100 µm. (d) Confocal microscopy analysis of GUVs 5 min after the addition of 1 µM peptide 3. Diameters of GUVs typically observed are about 20 µm.
